# Supplementary material
Source: publisher figshare collection journal article supplement (https://plos.figshare.com/articles/dataset/_/122284)
Supplement: Supplementary file 1 [file 1]

Archive with 16 entries (16 files):
- Figure_S1.tif
- Figure_S2.tif
- Figure_S3.tif
- Figure_S4.tif
- Figure_S5.tif
- Figure_S6.tif
- Figure_S7.pdf
- Figure_S8.pdf
- Figure_S9.pdf
- Figure_S10.pdf
- Figure_S11.pdf
- Figure_S12.tif
- Table_S1.xlsx
- Table_S2.pdf
- Table_S3.pdf
- Text_S1.pdf
