# Supplementary material
Source: publisher figshare collection journal article supplement (https://plos.figshare.com/articles/dataset/_/122284)
Supplement: Supplementary file 1 [file 1 › Table_S1.xlsx]

## Sheet: LIBRARY DESIGN
Sequence #	12-mer (5' to 3')	core	binding to Her1			binding to Her7:Hes6 heterodimer			promoter of origin	distance from ATG	tested in Y1H	fragment	Interaction with Her1 in Y1H
			rel. affinity	standard error	R2 of fit	rel. affinity	standard error	R2 of fit
1	GCCCACGGGCCC	CACGGG	0.144298	0.0313302	0.511575	0.0279261	0.00171264	0.8974	dlc	-7531	N	n.a.	n.a.
2	TGGCACGTGTCC	CACGTG	1	0.0321293	0.953602	1	0.0512146	0.891	dlc	-6129	N	n.a.	n.a.
3	AGCCTCGTGTAA	CACGAG	0.0362788	0.00627089	0.30297	0.051625	0.00244027	0.9201	dlc	-6062	N	n.a.	n.a.
4	CTGCACGTGCAT	CACGTG	0.0391408	0.00232295	0.872459	0.158037	0.00222536	0.9924	dlc	-3176	N	n.a.	n.a.
5	CGACACGCGGTG	CACGCG	0.0407531	0.00224637	0.830044	0.0848601	0.0017448	0.9842	dlc	-3137	N	n.a.	n.a.
6	ATCCACGTGTCC	CACGTG	0.302848	0.0145425	0.911697	0.255932	0.00386088	0.9915	dlc	-2931	Y	-2578 to -3063	Y
7	CATCACGTGAAA	CACGTG	0.0179921	0.00635921	-0.732443	0.0343725	0.00347954	0.4531	dlc	-2351	Y	-1650 to -2598	N
8	CAGCGCGTGCCT	CACGCG	0.227067	0.0106782	0.901024	0.463624	0.00425978	0.9967	dlc	-1437	Y	-1094 to -1672	Y
9	TTGCTCGTGCTT	CACGAG	0.0235063	0.00191767	0.632432	0.10916	0.00195102	0.9842	dlc	-1394	Y	-1094 to -1672	Y
10	AGACACGCGCTA	CACGCG	0.118027	0.00385176	0.948358	0.274903	0.00266763	0.9964	dlc	-1359	Y	-1094 to -1672	Y
11	TGACGCGTGTGA	CACGCG	0.118032	0.00595366	0.839468	0.386805	0.00529956	0.9931	dlc	-803	Y	-719 to -1114	N
12	TGTCGCGTGCCA	CACGCG	0.596717	0.0245953	0.890339	0.531493	0.00963894	0.9886	dlc	-672	Y	0 to -736	N
13	TATCTCGTGCTG	CACGAG	0.0289569	0.00109976	0.945219	0.0758188	0.00824247	0.6755	dlc	-468	Y	0 to -736	N
14	AAACACGAGCCA	CACGAG	0.0561895	0.00247204	0.888315	0.208455	0.00306063	0.9918	dlc	2	N	n.a.	n.a.
15	CTGCTCGTGCTT	CACGAG	0.019747	0.00116166	0.700905	0.103264	0.00314688	0.948	dlc	203	N	n.a.	n.a.
16	CAGCGCGTGTGC	CACGCG	0.056966	0.00149762	0.954091	0.178839	0.00224772	0.994	dlc	1083	N	n.a.	n.a.
17	TGCCGCGTGCAC	CACGCG	0.0329986	0.00214433	0.491335	0.162529	0.00187931	0.994	dlc	1373	N	n.a.	n.a.
18	GTACACGTGGCG	CACGTG	0.237234	0.00793138	0.910407	0.274799	0.00280577	0.9957	dlc	1508	N	n.a.	n.a.
19	TTCCACGGGTCT	CACGGG	0.0410591	0.00212227	0.914159	0.0587377	0.00206565	0.9379	dlc	3492	N	n.a.	n.a.
20	TTGCACGTGTAC	CACGTG	0.0555879	0.0021024	0.913999	0.178497	0.00236855	0.9932	her7	1	N	n.a.	n.a.
21	AGGCGCGTGGTG	CACGCG	0.0770215	0.00506188	0.435645	0.156666	0.00402734	0.9644	her7	-160	Y	0 to -669	Y
22	GGGCACGTGCGC	CACGTG	0.406047	0.00898862	0.957602	0.541811	0.016603	0.9661	her7	-591	Y	0 to -669	Y
23	GCCCACGCGCCG	CACGCG	0.118844	0.00729125	0.602333	0.167665	0.00250606	0.9891	her7	-640	Y	0 to 669	Y
24	CGGCGCGTGCCA	CACGCG	0.730381	0.0316138	0.790368	0.959033	0.0356423	0.8784	her7	-1265	Y	-660 to -1667	N
24	CGGCGCGTGCCA	CACGCG	0.730381	0.0316138	0.790368	0.959033	0.0356423	0.8784	her7	-1690	Y	-1647 to -2491	Y
25	GGTCGCGTGTGC	CACGCG	0.180688	0.0114561	0.685942	0.182292	0.00316598	0.9853	her7	-1794	Y	-1647 to -2491	Y
26	GGGCGCGTGCCG	CACGCG	0.576121	0.0101304	0.977192	0.747595	0.021047	0.9632	her7	-1829	Y	-1647 to -2491	Y
27	TGCCGCGTGCCG	CACGCG	0.215728	0.0104003	0.874311	0.368971	0.00322636	0.9971	her7	-1836	Y	-1647 to -2491	Y
28	GCGCTCGTGCGC	CACGAG	0.0291324	0.0050768	-0.104824	0.0860623	0.00202289	0.9713	her7	-1868	Y	-1647 to -2491	Y
29	GTTCGCGTGTGC	CACGCG	0.0452403	0.00123259	0.94334	0.100417	0.00205846	0.9777	her7	-1885	Y	-1647 to -2491	Y
30	CAGCACGTGTCT	CACGTG	0.456426	0.00980367	0.980958	0.678813	0.013991	0.984	her7	-2055	Y	-1647 to -2491	Y
31	AGCCACGTGGCT	CACGTG	0.570228	0.0192857	0.936714	0.346609	0.00812752	0.9745	her7	-2159	Y	-1647 to -2491	Y
32	CCGCGCGTGCCA	CACGCG	0.278962	0.0129477	0.843937	0.515949	0.0179163	0.9573	her7	-3063	Y	-2471 to -3031	Y
33	GTTCTCGTGTTT	CACGAG	0.0170834	0.00139927	0.645213	0.0264943	0.00159908	0.8884	her7	-3332	Y	-3010 to -3513	Y
34	TCCCACGGGAAT	CACGGG	0.0102519	0.000830042	-0.0100123	0.0103148	0.0010837	-0.1648	her7	-4153	Y	-3490 to -4185	N
35	AAGCACGTGATC	CACGTG	0.0423119	0.00126956	0.941667	0.0911732	0.00179661	0.9824	her1/her7	-6720 from her7 -5584 from her1	N	n.a.	n.a.
36	CTCCTCGTGTTG	CACGAG	0.0176903	0.000556649	0.959606	0.0604676	0.00276111	0.9316	her1/her7	-7812 from her7 -4492 from her1	N	n.a.	n.a.
37	CAACACGGGGTG	CACGGG	0.0260202	0.009779	-0.523129	0.0311086	0.00320362	0.3306	her1	-3567	N	n.a.	n.a.
38	CGACACGTGCTC	CACGTG	0.416109	0.00932965	0.960719	0.637653	0.0295522	0.9077	her1	-3157	Y	-3126 to -3220	Y
39	CTCCACGTGCCC	CACGTG	0.269299	0.00664533	0.956096	0.296745	0.00926107	0.9643	her1	-3072	Y	-3034 to -3128	Y
40	TCCCACGGGATT	CACGGG	0.020915	0.00256889	0.462388	0.0206689	0.00168403	0.7786	her1	-2334	Y	-1972 to -2685	Y
41	GTTCACGTGTGC	CACGTG	0.0341397	0.00138489	0.863068	0.102098	0.00486179	0.9118	her1	-2171	Y	-1972 to -2686	Y
42	TTCCACGAGAAA	CACGAG	0.0128501	0.000672488	0.825229	0.028565	0.00126863	0.9241	her1	-1152	Y	-3072	N
43	ATACACAGTGCGC	CACNGTG	0.012807	0.000424961	0.911047	0.0208387	0.00209985	0.5723	her1	-2493	Y	-1972 to -2685	Y
44	TCACACCTGTGCAG	CACNNGTG	0.00942622	0.000286272	0.913693	0.0200293	0.00133276	0.7427	her7	-1851	Y	-1647 to -2491	Y
45	GCTCAGGTGCGT	CACCTG	0.00829409	0.000607254	0.189072	0.0134303	0.00092922	0.7889	her1	-3089	Y	-3034 to -3128	Y
46	CTCCACAAACCC	CACAAA	0.0105419	0.000669972	-0.224872	0.0131049	0.00107857	0.7209	control	n.a.	n.a.		n.a.
47	CTCAAAAAACCC	AAAAAA	0.0104501	0.000539475	0.64664	0.0137293	0.0011235	0.5137	control	n.a.	n.a.		n.a.
