# Supplementary material
Source: publisher figshare collection journal article supplement (https://plos.figshare.com/articles/dataset/_/122284)
Supplement: Supplementary file 1 [file 1 › Table_S2.pdf]

**Table S2.** Parameters of the full model, Eqs. (1-9).

| Parameter    | Description                                                           |
|--------------|-----------------------------------------------------------------------|
| $k_\mu$      | production rate (transcription + translation) of the monomer          |
| $x_{\mu\nu}$ | concentration of dimer that halves production rate                    |
| $n_\mu$      | phenomenological Hill coefficients describing effective cooperativity |
| $c_\mu$      | degradation rate of the monomer                                       |
| $a_{\mu\nu}$ | rate at which Her $\mu$ and Her $\nu$ monomers form dimers            |
| $b_{\mu\nu}$ | rate at which the dimer Her $\mu$ :Her $\nu$ breaks into monomers     |
| $c_{\mu\nu}$ | degradation rate of the dimer                                         |
| $\tau_\mu$   | production delay of the monomer                                       |
