# Supplementary material
Source: publisher figshare collection journal article supplement (https://plos.figshare.com/articles/dataset/_/122284)
Supplement: Supplementary file 1 [file 1 › Table_S3.pdf]

**Table S3.** Parameters of the minimal model in Eqs. (14-16). The values used in our simulations are shown. For  $\kappa_6$  we studied a range of values.

| Parameter  | Description                                                           | Value or range |
|------------|-----------------------------------------------------------------------|----------------|
| $\kappa_1$ | Her1 dimensionless production rate                                    | 10             |
| $\kappa_7$ | Her7 dimensionless production rate                                    | 10             |
| $\kappa_6$ | Hes6 dimensionless production rate                                    | 0 - 91         |
| $\delta$   | dimensionless effective dimer mediated degradation rate               | 1              |
| $\tau_1$   | dimensionless Her1 production delay                                   | 1.02           |
| $\tau_7$   | dimensionless Her7 production delay                                   | 1.00           |
| $n$        | phenomenological Hill coefficients describing effective cooperativity | 2              |
