# Supplementary material
Source: publisher figshare collection journal article supplement (https://plos.figshare.com/articles/dataset/_/122284)

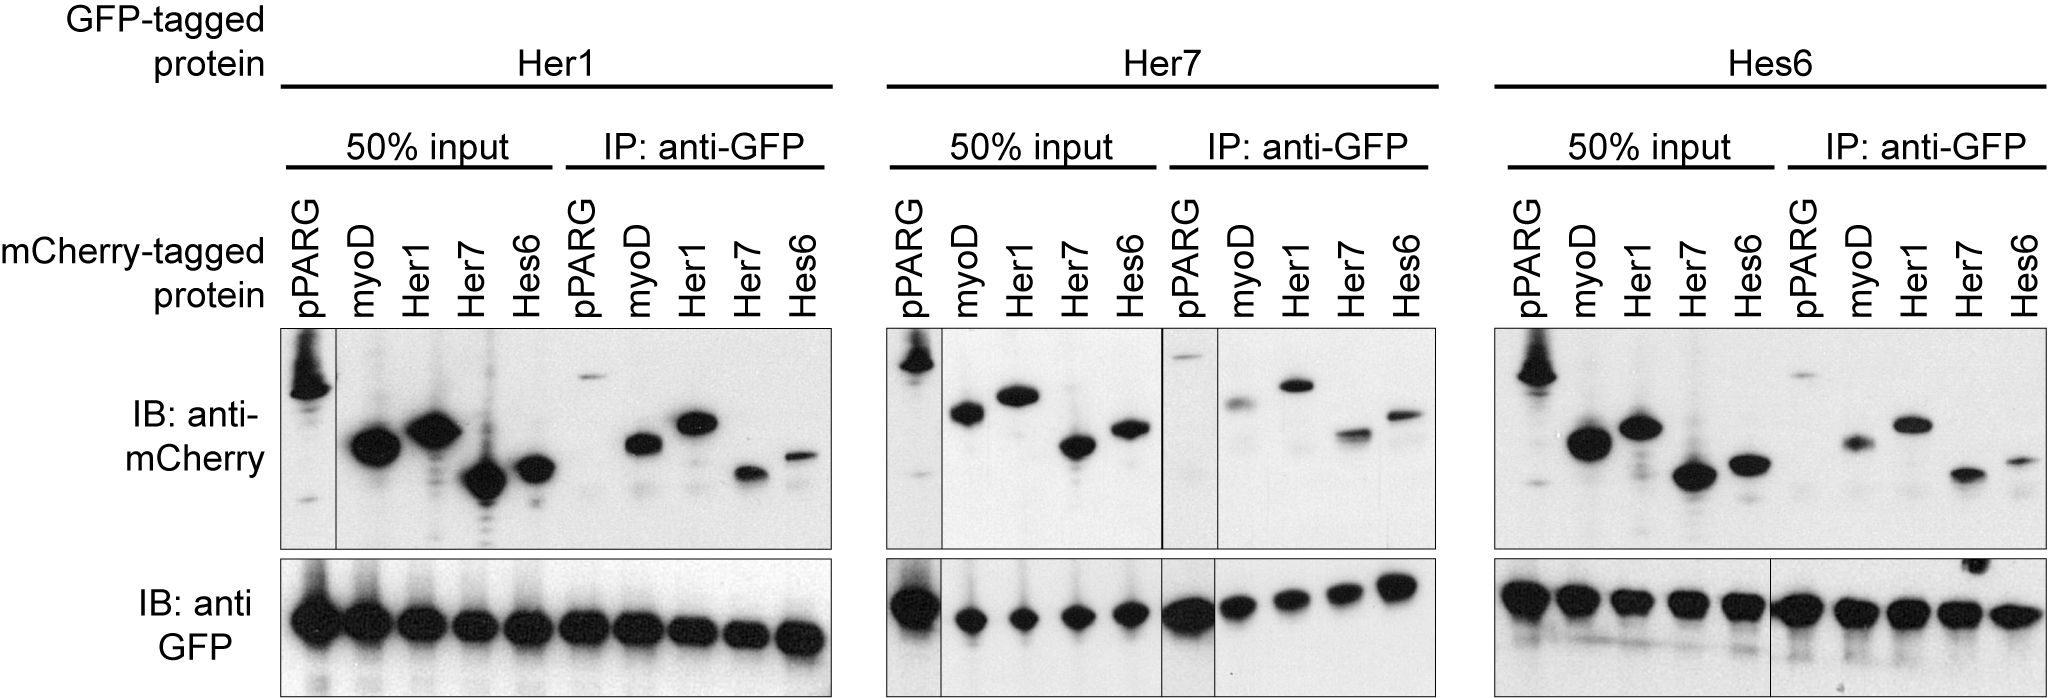

Supplement: Supplementary file 1 [file 1 › Figure_S1.tif]

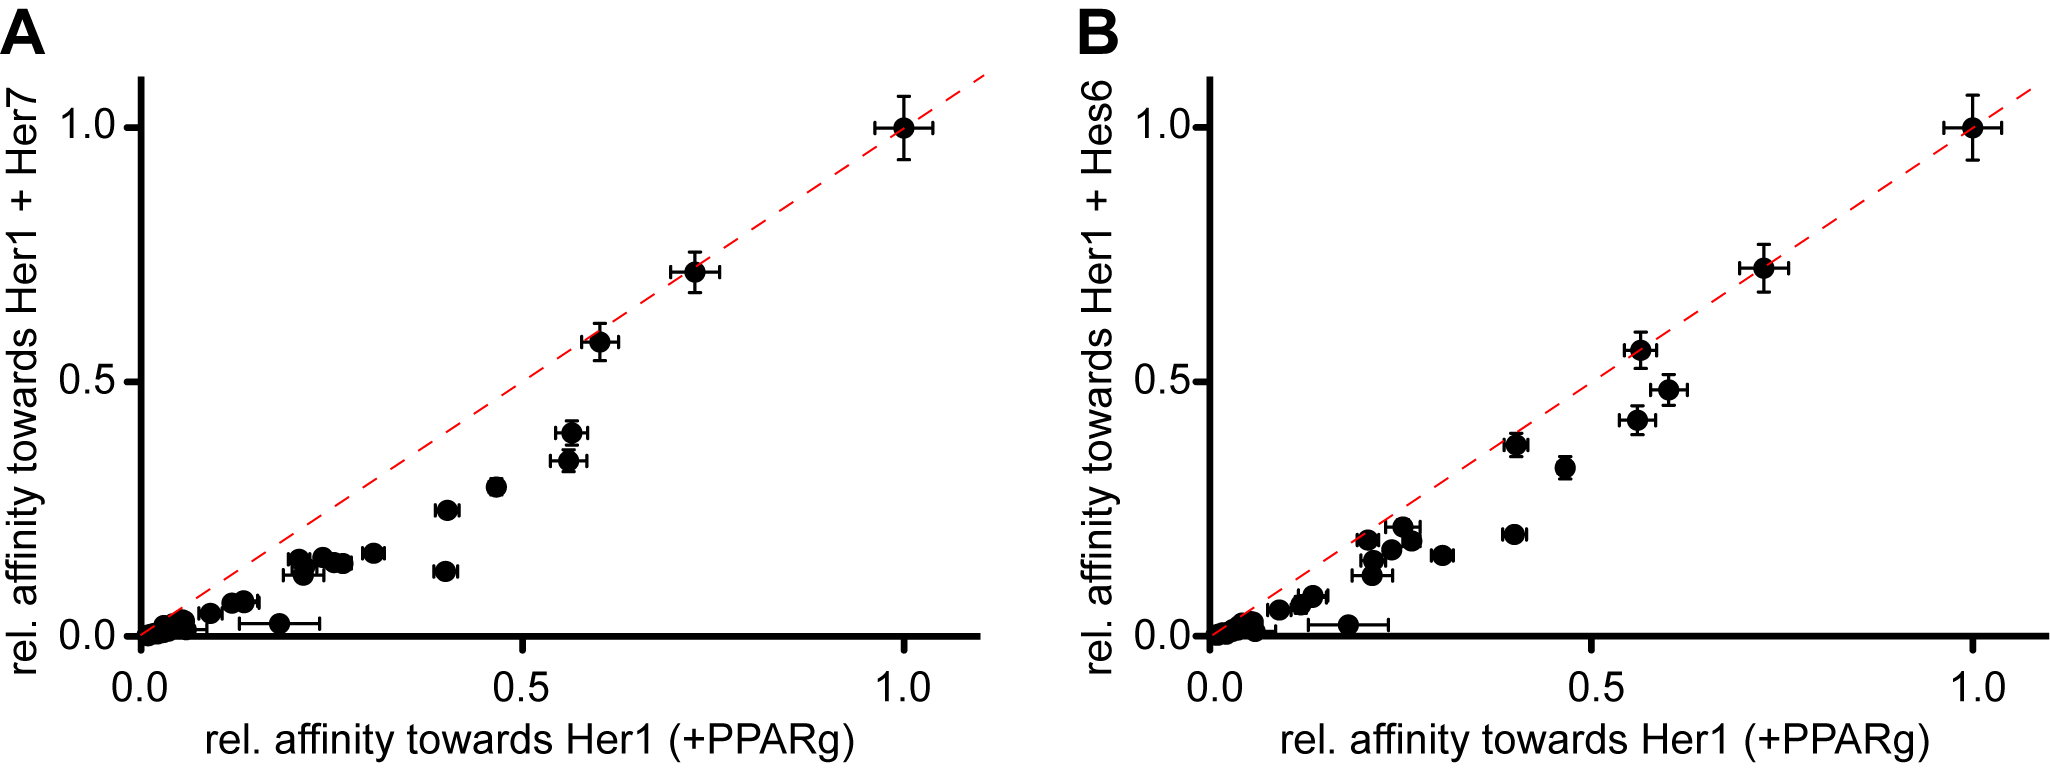

Supplement: Supplementary file 1 [file 1 › Figure_S2.tif]

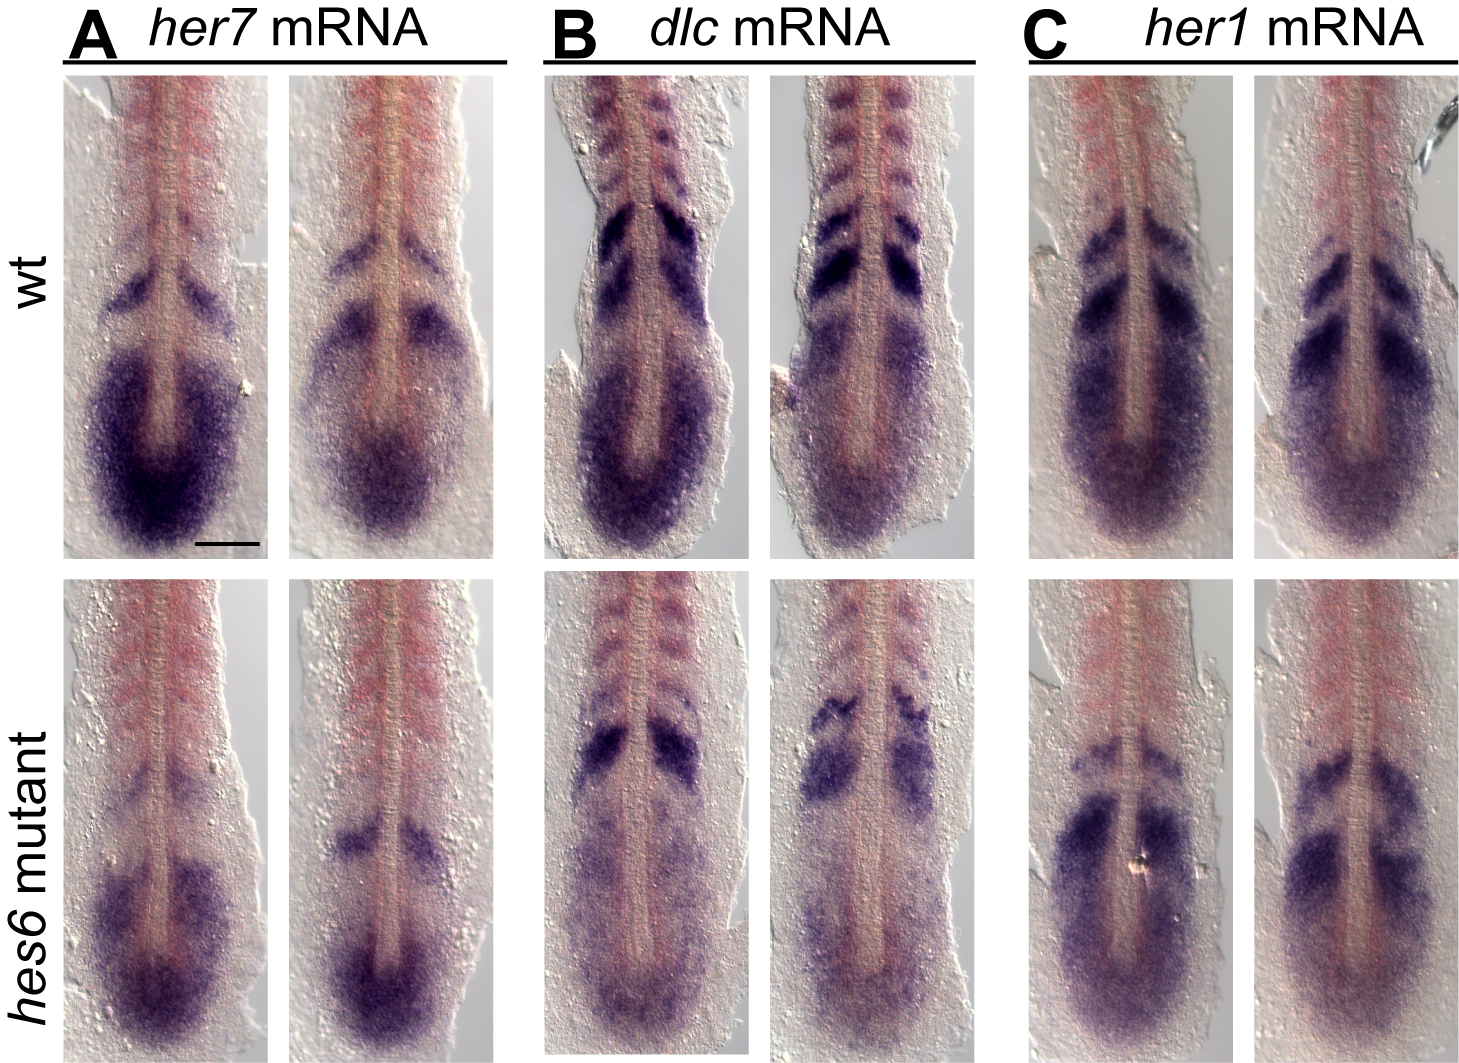

Supplement: Supplementary file 1 [file 1 › Figure_S3.tif]

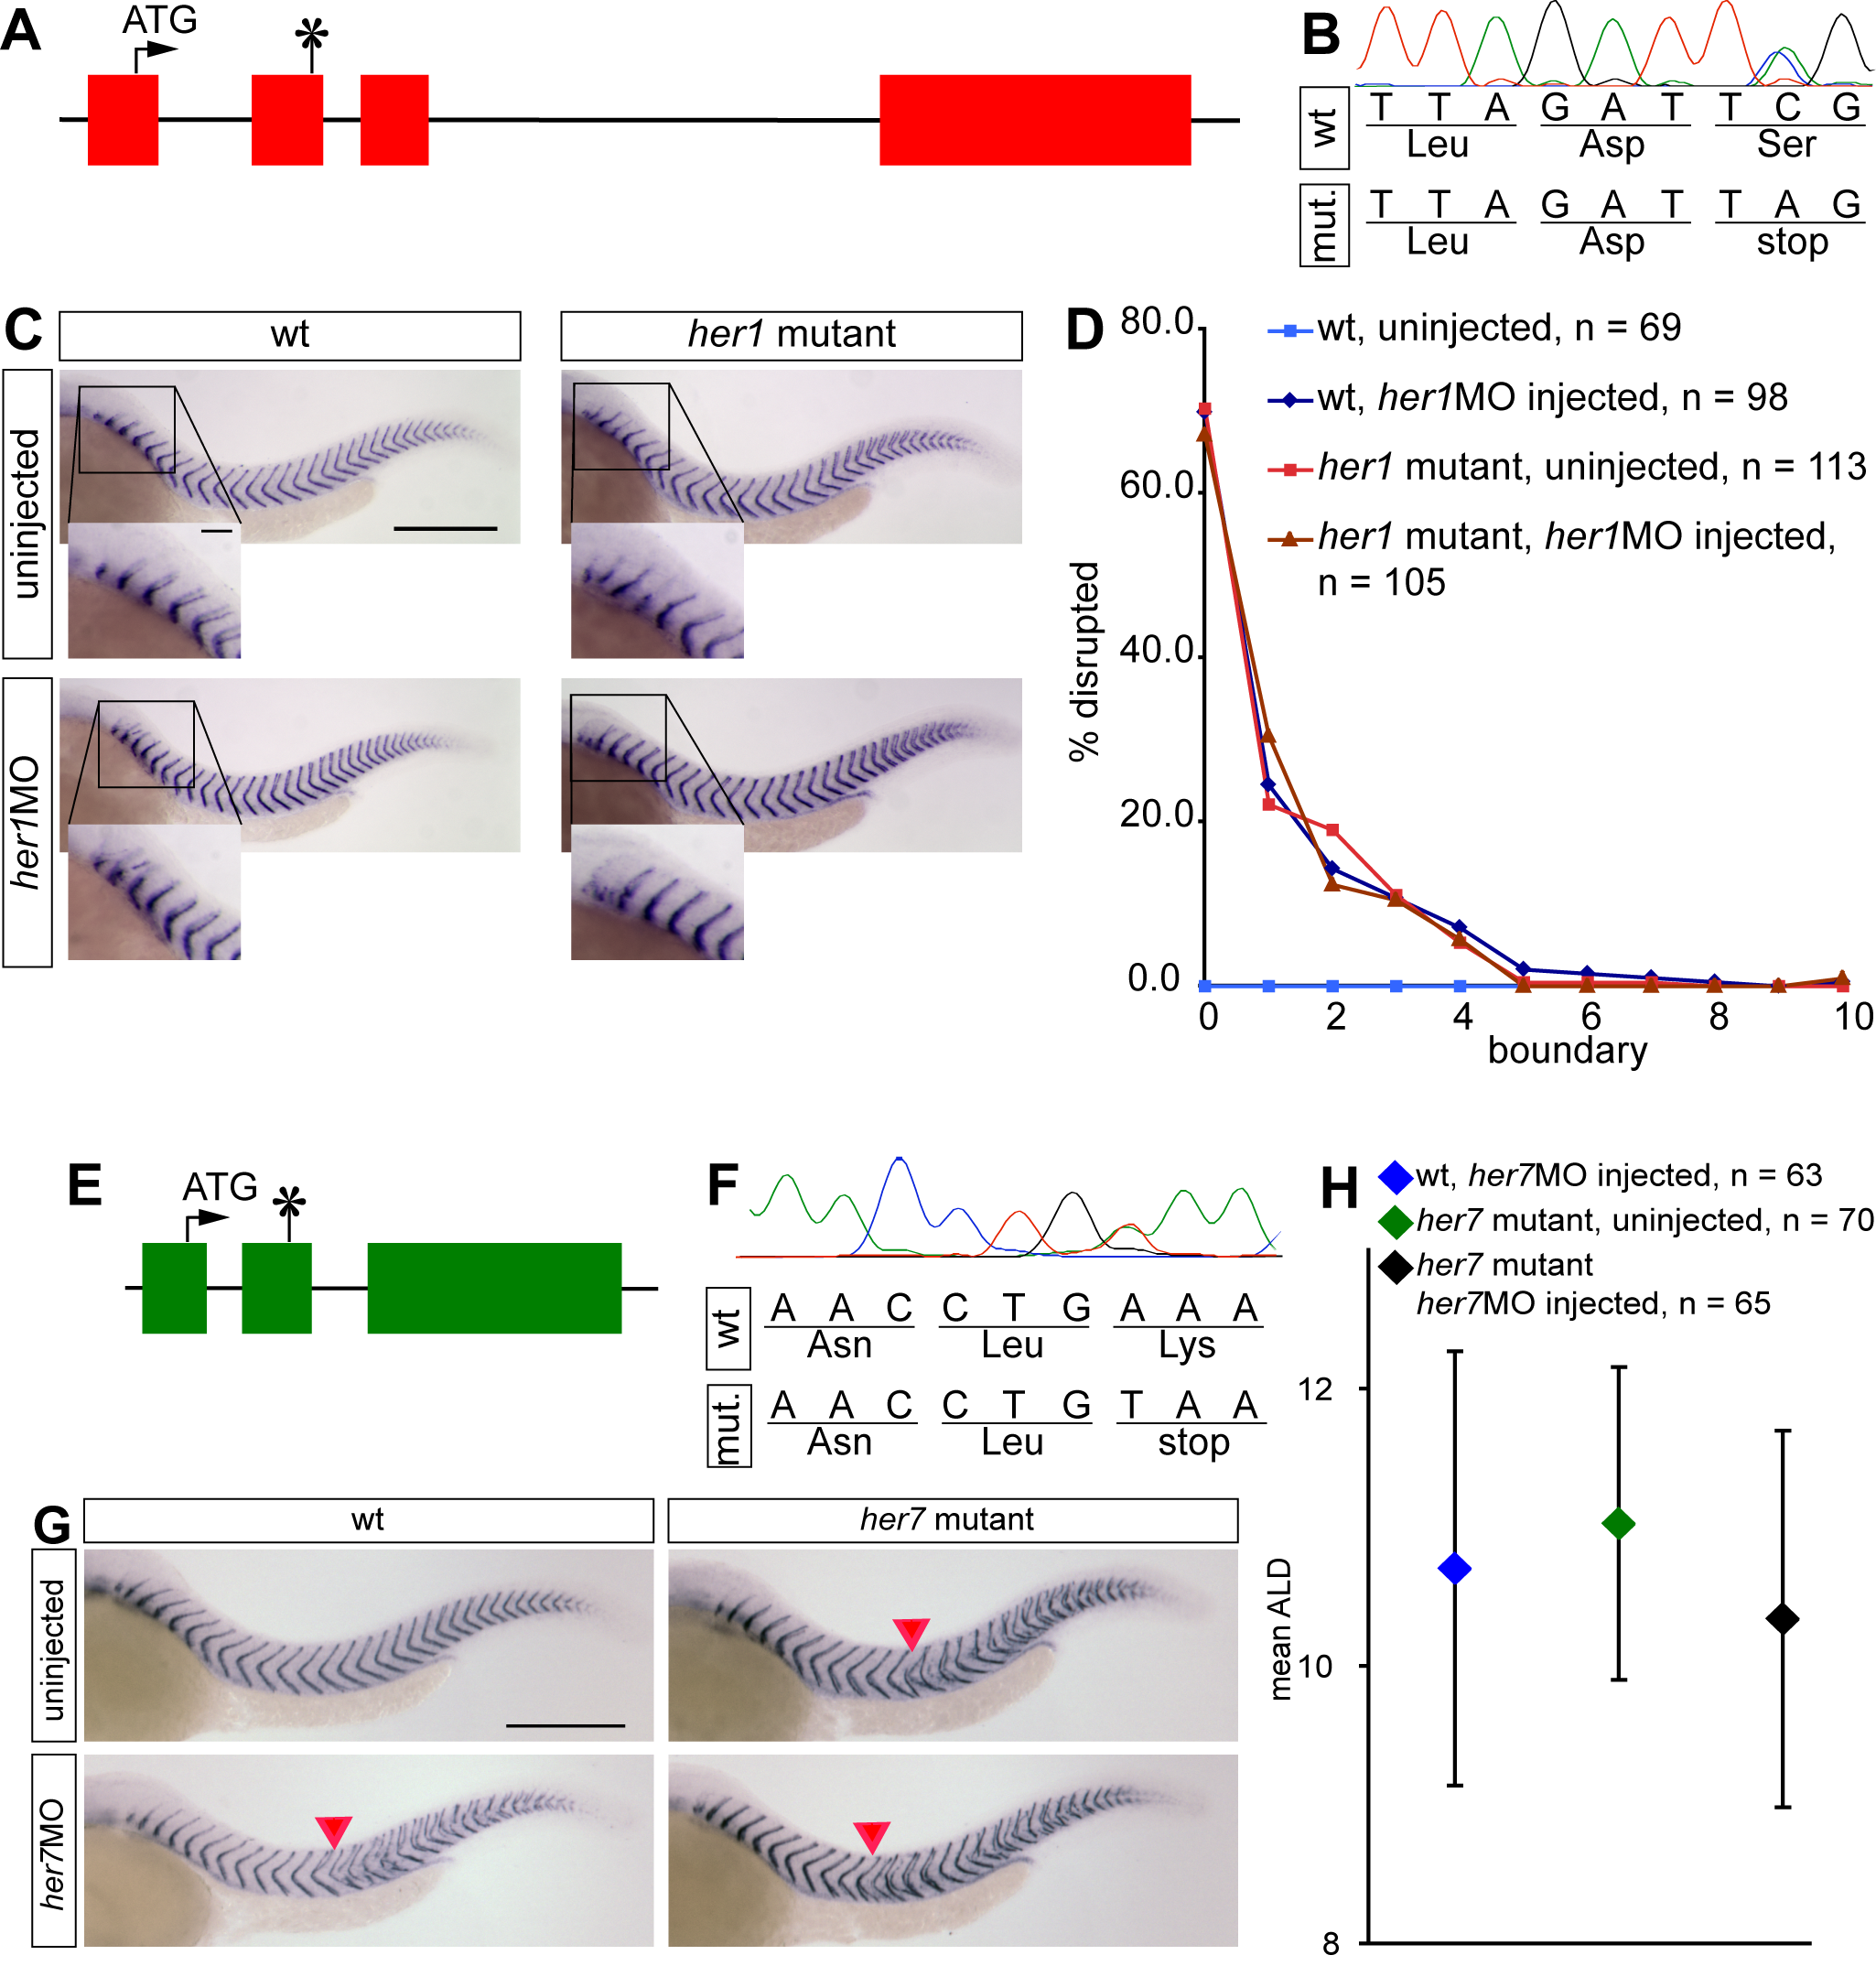

Supplement: Supplementary file 1 [file 1 › Figure_S4.tif]

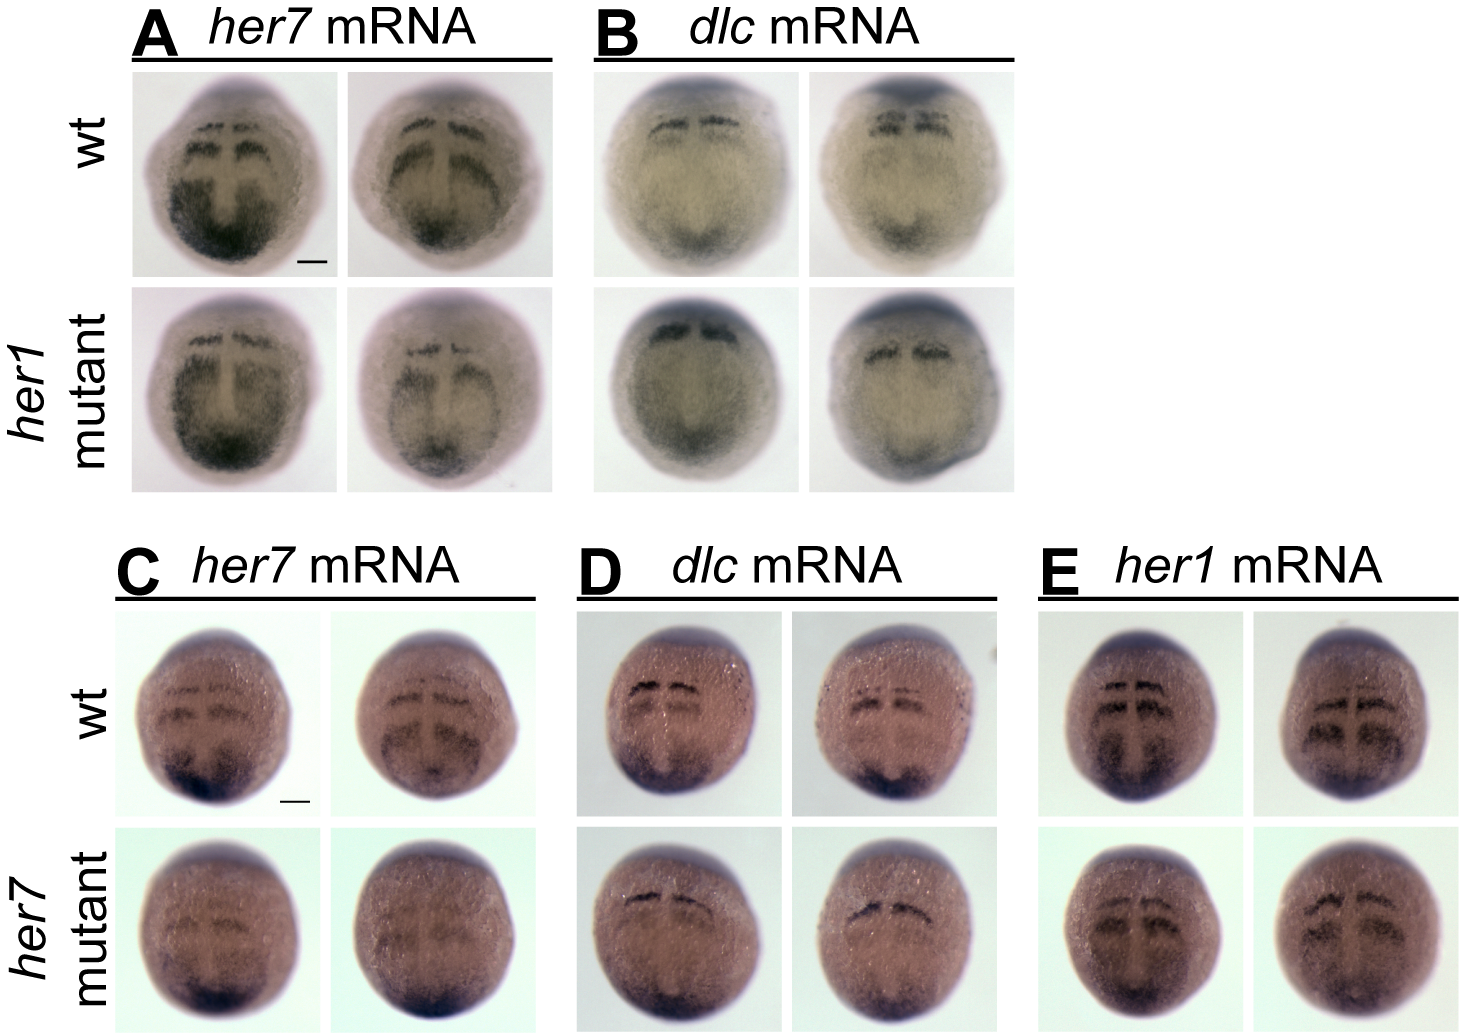

Supplement: Supplementary file 1 [file 1 › Figure_S5.tif]

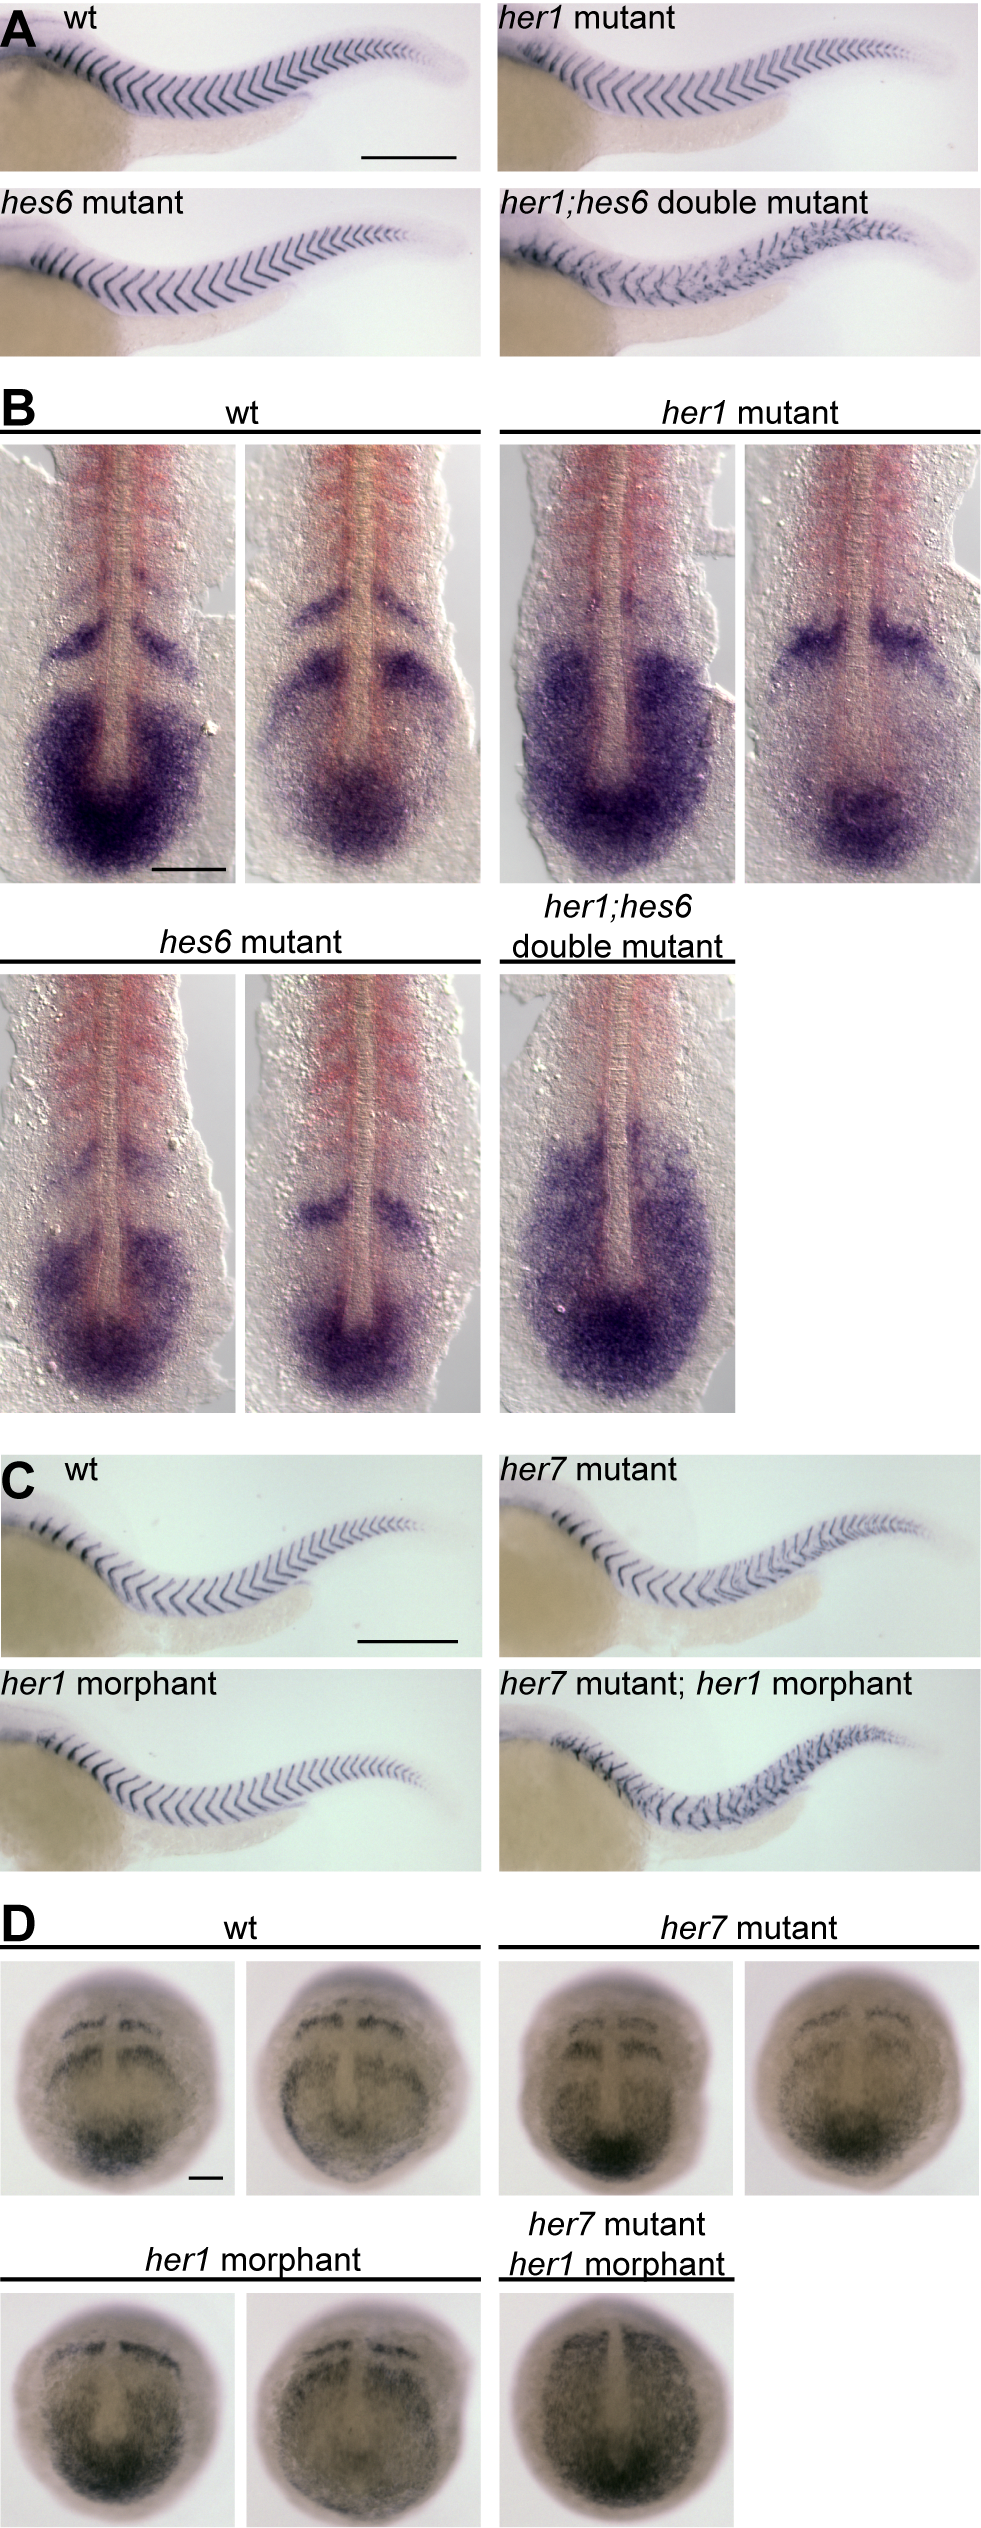

Supplement: Supplementary file 1 [file 1 › Figure_S6.tif]

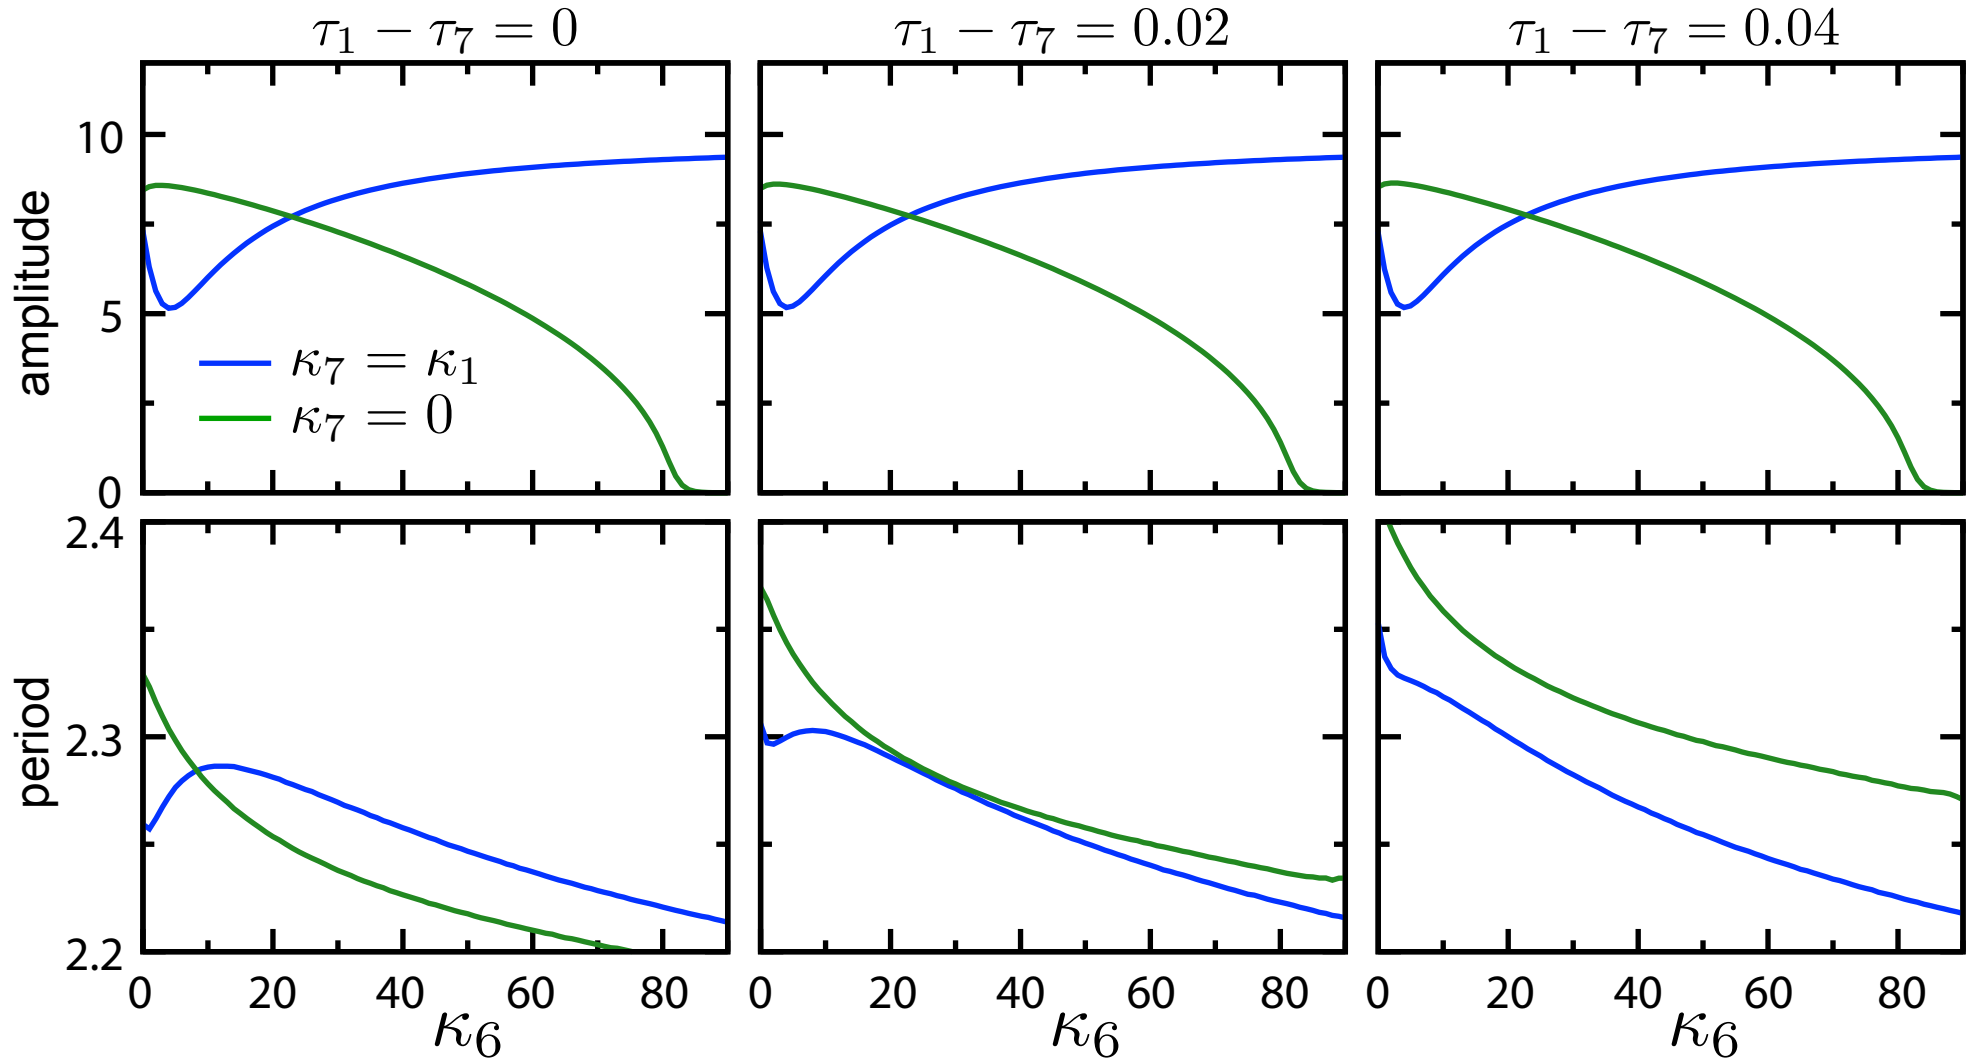

Supplement: Supplementary file 1 [file 1 › Figure_S7.pdf]

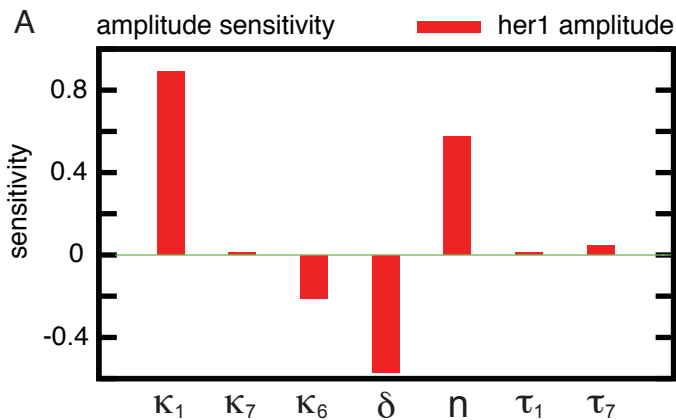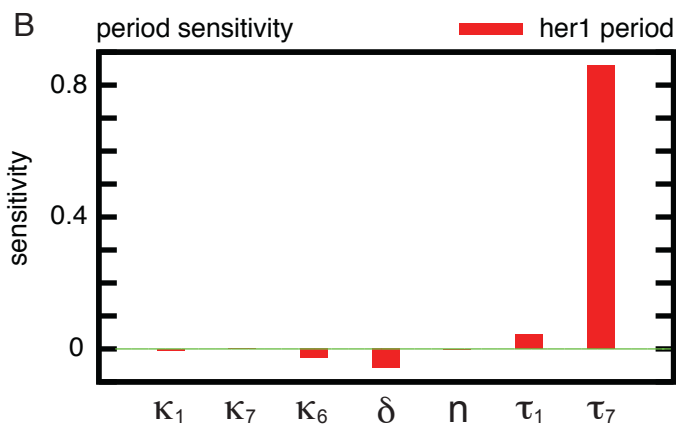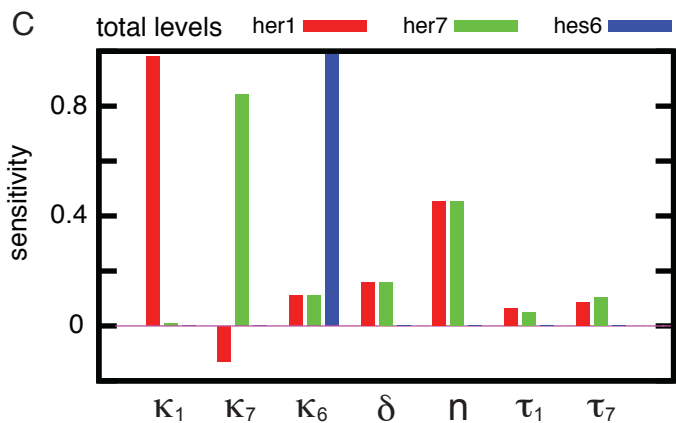

Supplement: Supplementary file 1 [file 1 › Figure_S8.pdf]

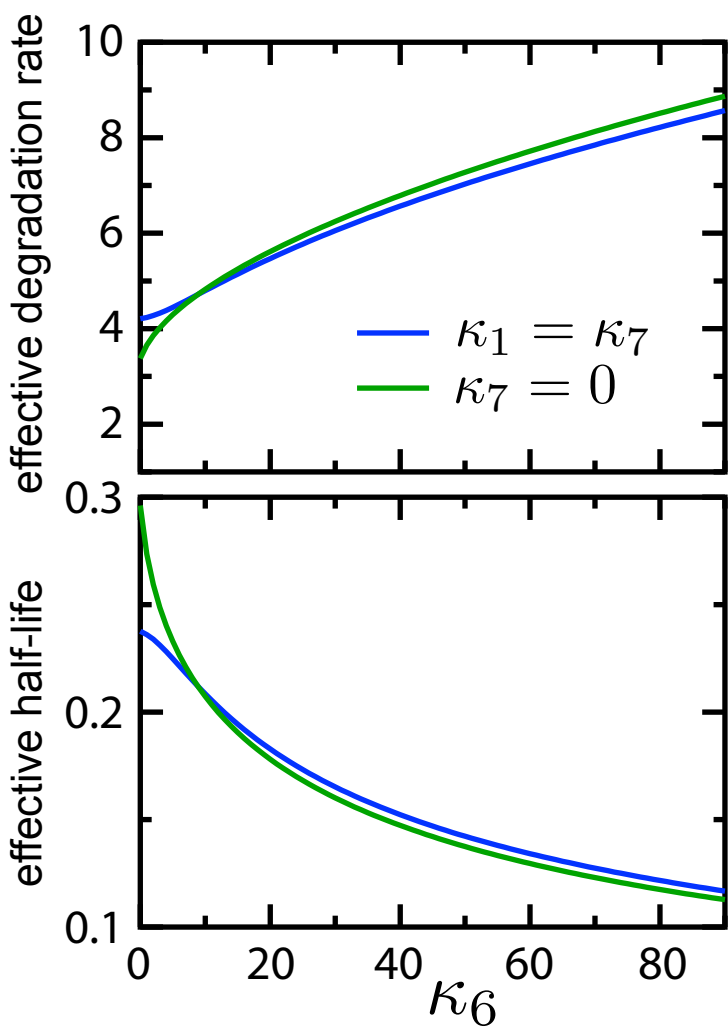

Supplement: Supplementary file 1 [file 1 › Figure_S9.pdf]

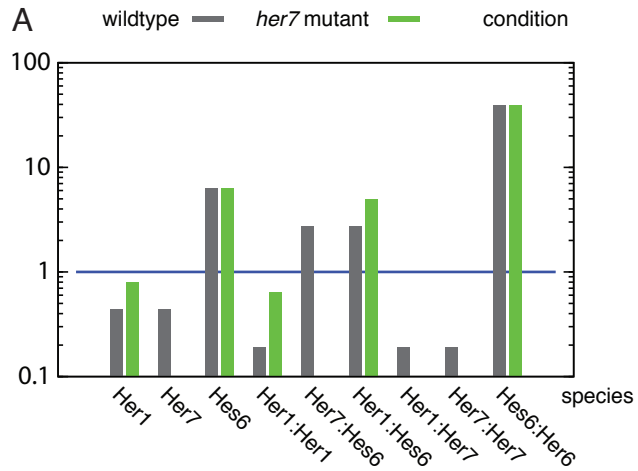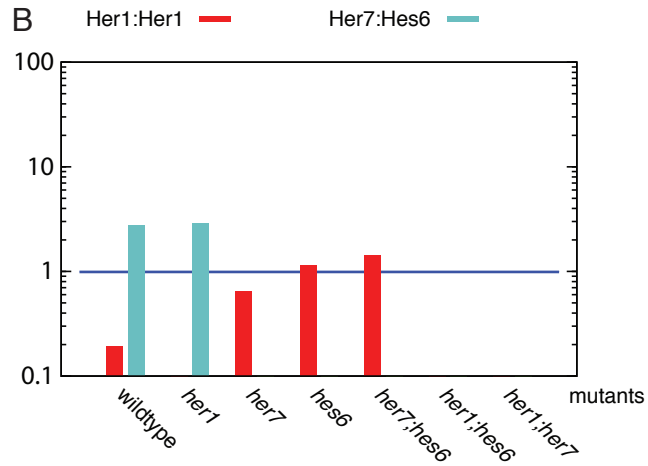

Supplement: Supplementary file 1 [file 1 › Figure_S10.pdf]

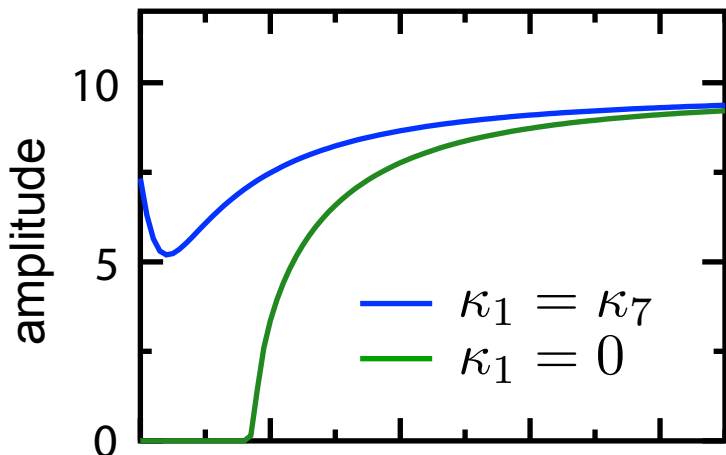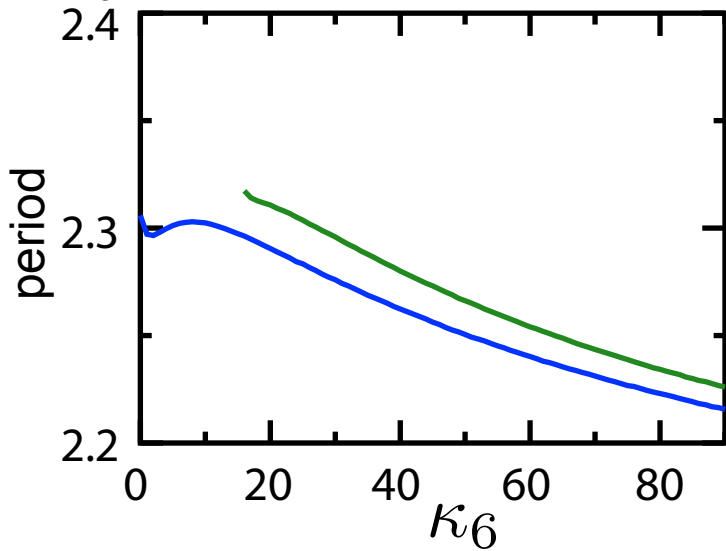

Supplement: Supplementary file 1 [file 1 › Figure_S11.pdf]

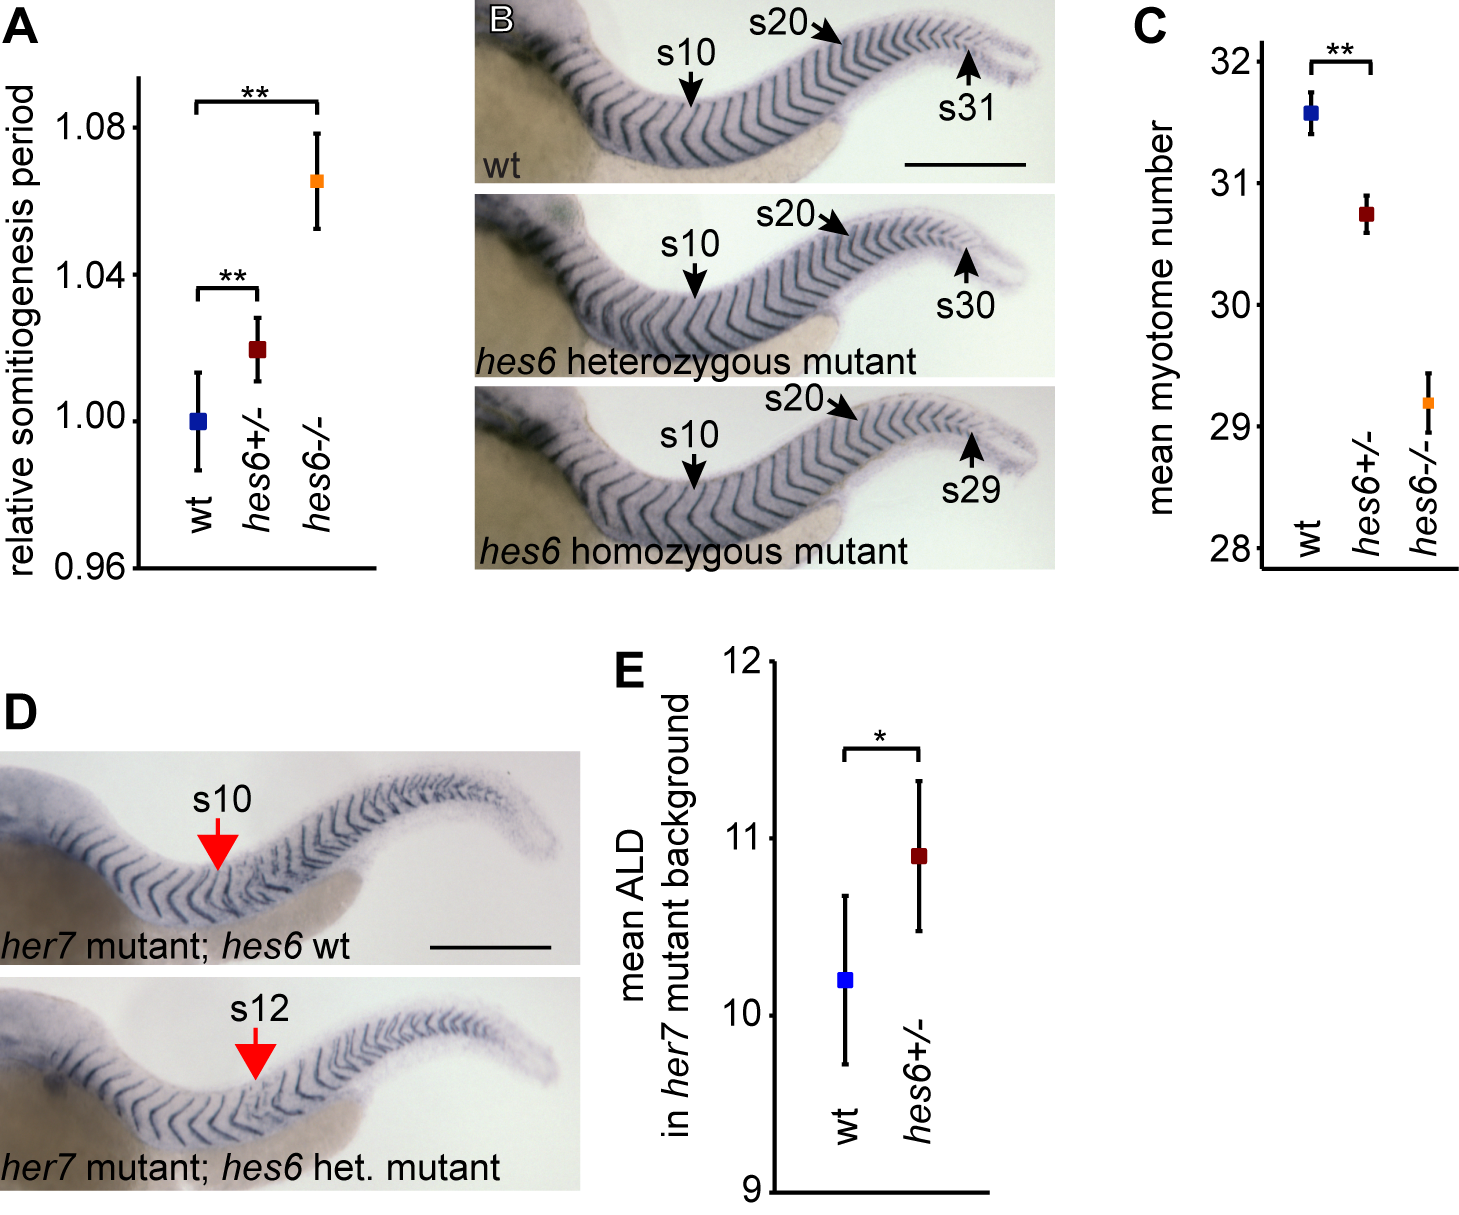

Supplement: Supplementary file 1 [file 1 › Figure_S12.tif]
